# Supplementary material for: Relevance of Catholic Parish Churches in Public Space in Barcelona: Historical Analysis and Future Perspectives
Source: MDPI journal article supplement (doi:10.3390/buildings13061370), 2023-05-24
Supplement: s1 [file s1]

## Article

# Relevance of Catholic Parish Churches in Public Space in Barcelona: Historical Analysis and Future Perspectives

Alba Arboix-Alió <sup>1,\*</sup>, Josep Maria Pons-Poblet <sup>2</sup>, Adrià Arboix <sup>3</sup> and Jordi Arboix-Alió <sup>4</sup>

<sup>1</sup> Departament d'Arts Visuals i Disseny, Universitat de Barcelona (UB), 08028 Barcelona, Spain

<sup>2</sup> Departament de Resistència de Materials i Estructures a l'Enginyeria, Universitat Politècnica de Catalunya (UPC), 08028 Barcelona, Spain

<sup>3</sup> Cerebrovascular Division, Department of Neurology, Hospital Universitari del Sagrat Cor, Universitat de Barcelona, 08029 Barcelona, Spain

<sup>4</sup> Department of Sports Science, Ramon Llull University, FPCEE Blanquerna, 08025 Barcelona, Spain

\* Correspondence: alba.arboix@ub.edu

**Citation:** Arboix-Alió, A.; Pons-Poblet, J.M.; Arboix, A.; Arboix-Alió, J. Relevance of Catholic Parish Churches in Public Space in Barcelona: Historical Analysis and Future Perspectives. *Buildings* **2023**, *13*, 1370. <https://doi.org/10.3390/buildings13061370>

Academic Editors: Nikos A. Salingaros and Hao Wang

Received: 26 March 2023

Revised: 19 May 2023

Accepted: 22 May 2023

Published: 24 May 2023

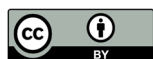

**Copyright:** © 2023 by the authors. Licensee MDPI, Basel, Switzerland. This article is an open access article distributed under the terms and conditions of the Creative Commons Attribution (CC BY) license (<https://creativecommons.org/licenses/by/4.0/>).

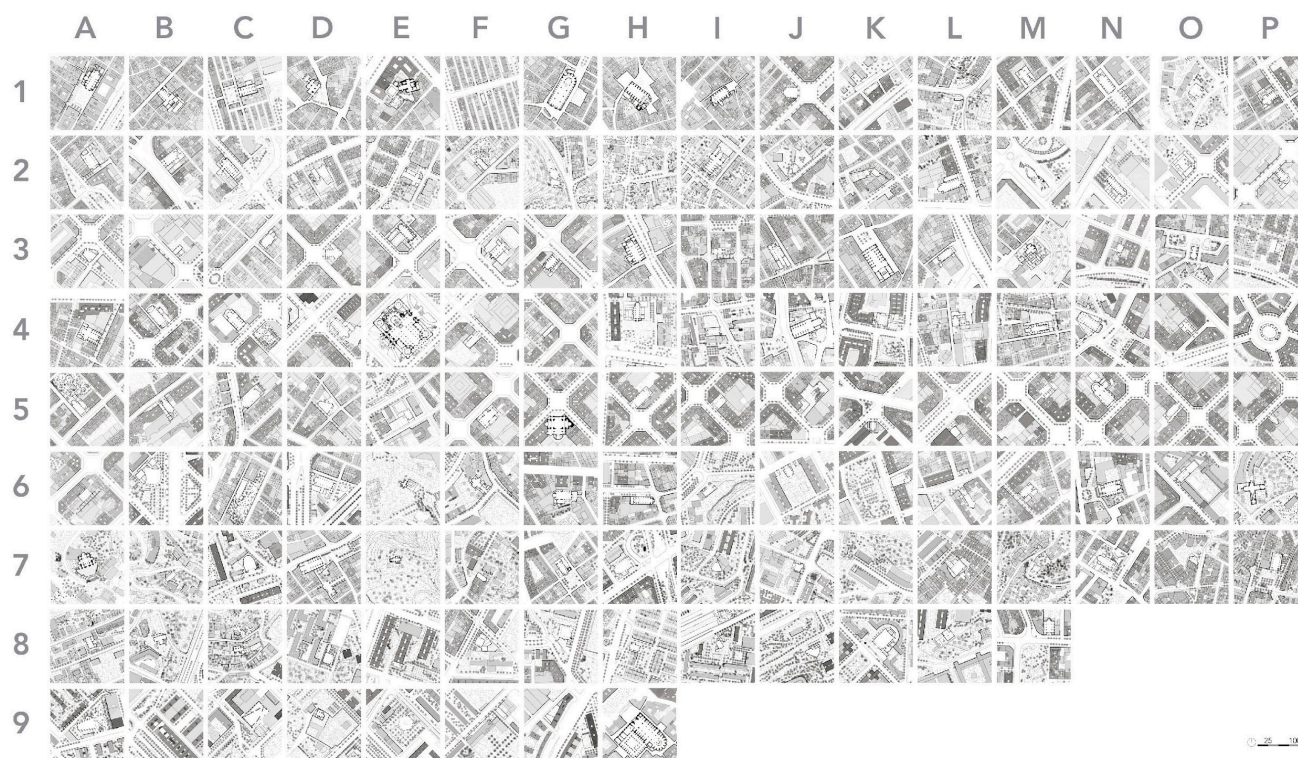

**Figure 2.** Urban layout of the parish churches of Barcelona with the sacred interior open to the surrounding public space. The drawing is in the style of Nolli's famous plan, and at the end, the names of all the churches, shown with the proposed alphanumeric code. The figure was created by the authors.

Name of the churches with their alphanumeric code:

1A· *Mare de Déu de la Mercè i Sant Miquel Arcàngel*

1B· *Sant Jaume*

1C· *Sant Miquel del Port*

1D· *Sant Pere de les Puel·les*

1E· *Santa Anna*

1F· *Santa Maria de Cervelló*

1G· *Santa Maria del Mar*

1H· *Santa Maria del Pi*

1I· *Sants Just i Pastor*

1J· *Corpus Christi*

1K· *Mare de Déu de la Salut*

1L· *Mare de Déu del Coll*

1M· *Sant Carles Borromeu*

1N· *Sant Joan de Gràcia*

1O· *Sant Jordi*

1P· *Sant Miquel dels Sants*

2A· *Santa Maria de Gràcia*

2B· *Santa Teresa de l'Infant Jesús*

2C· Verge de Gràcia i Sant Josep  
2D· Crist Redemptor  
2E· Mare de Déu de Montserrat  
2F· Santa Isabel d'Aragó i Sant Joaquim  
2G· Mare de Déu de Mont Carmel  
2H· Sant Antoni de Pàdua  
2I· Sant Joan d'Horta  
2J· Sant Marcel  
2K· Santa Teresa de Jesús  
2L· Sant Ramon Nonat  
2M· Patriarca Abraham  
2N· Sagrat Cor de Jesús  
2O· Sant Fèlix  
2P· Sant Francesc d'Assís  
3A· Sant Francesc de Pàola  
3B· Sant Pancraç  
3C· Santa Maria del Taulat i Sant Bernat Calbó  
3D· Mare de Déu dels Àngels  
3E· Puríssima Concepció  
3F· Sant Francesc de Sales  
3G· Sant Ramon de Penyafort  
3H· Mare de Déu de Betlem  
3I· Mare de Déu de Lourdes  
3J· Mare de Déu del Carme  
3K· Sant Agustí  
3L· Sant Josep i Santa Mònica  
3M· Sant Pau  
3N· Sant Pere Claver  
3O· Sant Pere Nolasc  
3P· Sant Salvador d'Horta  
4A· Santa Madrona  
4B· Esperit Sant  
4C· Immaculate Cor de Maria  
4D· Mare de Déu del Roser  
4E· Sagrada Família  
4F· Sant Oleguer, Bisbe  
4G· Sant Tomàs d'Aquino  
4H· Crist Rei  
4I· El Bon Pastor  
4J· Sant Andreu  
4K· Sant Joan de Mata  
4L· Sant Josep Manyanet

4M· Sant Pacia  
4N· Sants Gervasi i Protasi  
4O· Mare de Déu de Núria  
4P· Sant Gregori Taumaturg  
5A· Sant Ildefons  
5B· Santa Agnès  
5C· Santa Cecília  
5D· Santa Joaquina de Vedruna  
5E· Verge de la Pau  
5F· Mare de Déu de la Medalla Miraculosa  
5G· Mare de Déu del Pilar  
5H· Maria Mitjancera de Totes les Gràcies  
5I· Preciosíssima Sang de Nostre Senyor Jesucrist  
5J· Sant Domènec Guzmán  
5K· Sant Eugeni I, Papa  
5L· Sant Ferran  
5M· Sant Isidor  
5N· Sant Josep Oriol  
5O· Sant Llorenç  
5P· Sant Sever i Sant Vicenç de Paül  
6A· Sant Ignasi de Loiola  
6B· Sant Joan Bosco  
6C· Sant Josep de Calassanç  
6D· Sant Martí del Clot  
6E· Romànica del Poble Espanyol  
6F· Mare de Déu de Port  
6G· Mare de Déu dels Dolors  
6H· Sant Àngel Custodi  
6I· Sant Bartomeu  
6J· Sant Cristòfol  
6K· Sant Joan M<sup>a</sup> Vianney  
6L· Sant Medir  
6M· Santa Dorotea  
6N· Santa Maria de Sants  
6O· Maria Auxiliadora  
6P· Maria Reina  
7A· Sagrat Cor de Jesús del Tibidabo  
7B· Sant Joan de la Creu  
7C· Sant Ot  
7D· Sant Vicenç  
7E· Santa Creu d'Olorda  
7F· Santa Maria de Vallvidrera

7G· *Santa Maria del Remei*  
7H· *Santa Tecla*  
7I· *Sant Bernat de Claravall*  
7J· *Sant Josep Obrer*  
7K· *Sant Marc*  
7L· *Sant Sebastià*  
7M· *Santa Bernardeta*  
7N· *Santa Engràcia*  
7O· *Santa Maria Magdalena*  
7P· *Santíssima Trinitat*  
8A· *Sant Cebrià*  
8B· *Sant Crist*  
8C· *Sant Genís dels Agudells*  
8D· *Sant Jeroni*  
8E· *Verge de Natzaret*  
8F· *Mare de Déu de Fàtima*  
8G· *Sant Esteve*  
8H· *Sant Francesc Xavier*  
8I· *Sant Mateu*  
8J· *Sant Narcís*  
8K· *Sant Pius X*  
8L· *Sant Rafael*  
8M· *Santa Eulàlia de Vilapicina*  
9A· *Sant Ambrós*  
9B· *Sant Joan d'Àvila*  
9C· *Sant Lluís Gonzaga*  
9D· *Sant Martí de Provençals*  
9E· *Sant Paulí de Nola*  
9F· *Sant Pere Ermengol*  
9G· *Santíssim Sagrament*  
9H· *La Catedral*

**Disclaimer/Publisher's Note:** The statements, opinions and data contained in all publications are solely those of the individual author(s) and contributor(s) and not of MDPI and/or the editor(s). MDPI and/or the editor(s) disclaim responsibility for any injury to people or property resulting from any ideas, methods, instructions or products referred to in the content.
